# Supplementary material for: Oestradiol synthesized by female neurons generates sex differences in neuritogenesis
Source: PubMed Central journal article supplement (PMC4995407; doi:10.1038/srep31891), 2016-08-24
Supplement: srep31891-s1.pdf [file srep31891-s1.pdf]

1 **Supplementary Information for:**

2

3 **Oestradiol synthesized by female neurons generates sex**  
4 **differences in neuritogenesis**

5

6 Isabel Ruiz-Palmero<sup>1</sup>, Ana Ortiz-Rodriguez<sup>1</sup>, Roberto Cosimo Melcangi<sup>2</sup>, Donatella  
7 Caruso<sup>2</sup>, Luis M. Garcia-Segura<sup>1,\*</sup>, Gabriele M. Rune<sup>3</sup> and Maria-Angeles Arevalo<sup>1</sup>

8

9 <sup>1</sup> Instituto Cajal, Consejo Superior de Investigaciones Científicas (CSIC), Avenida  
10 Doctor Arce 37; 28002 Madrid, Spain

11 <sup>2</sup> Dipartimento di Scienze Farmacologiche e Biomolecolari, Center of Excellence  
12 on Neurodegenerative Diseases, Università degli Studi di Milano, Via G. Balzaretti  
13 9, 20133 Milan, Italy

14 <sup>3</sup> Institute of Neuroanatomy, University Medical Center Hamburg-Eppendorf,  
15 Martinistr. 52, 20246 Hamburg, Germany

16 \* **Corresponding author:** [lmgs@cajal.csic.es](mailto:lmgs@cajal.csic.es)

17

1 **Supplementary Fig. S1**

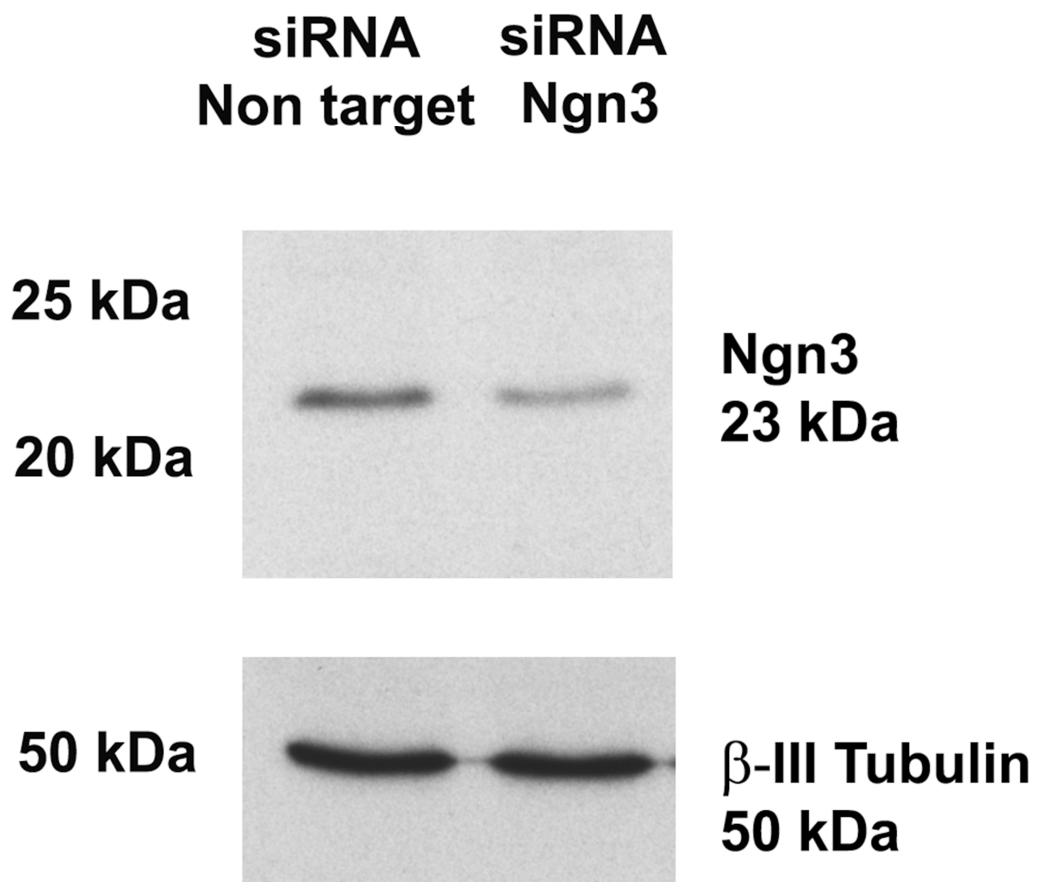

2

3

4

5 **Supplementary Fig. S1. Downregulation of Ngn3 expression by the action of**

6 **a specific Ngn3 siRNA.** The efficacy of Ngn3 silencing was verified by Western

7 blot. The band corresponding to the molecular weight of Ngn3 (23 kDa), decreases

8 after the Ngn3 siRNA treatment respect to the non target siRNA in cultured

9 hippocampal neurons.

10

11

12

1 **Supplementary Fig. S2**

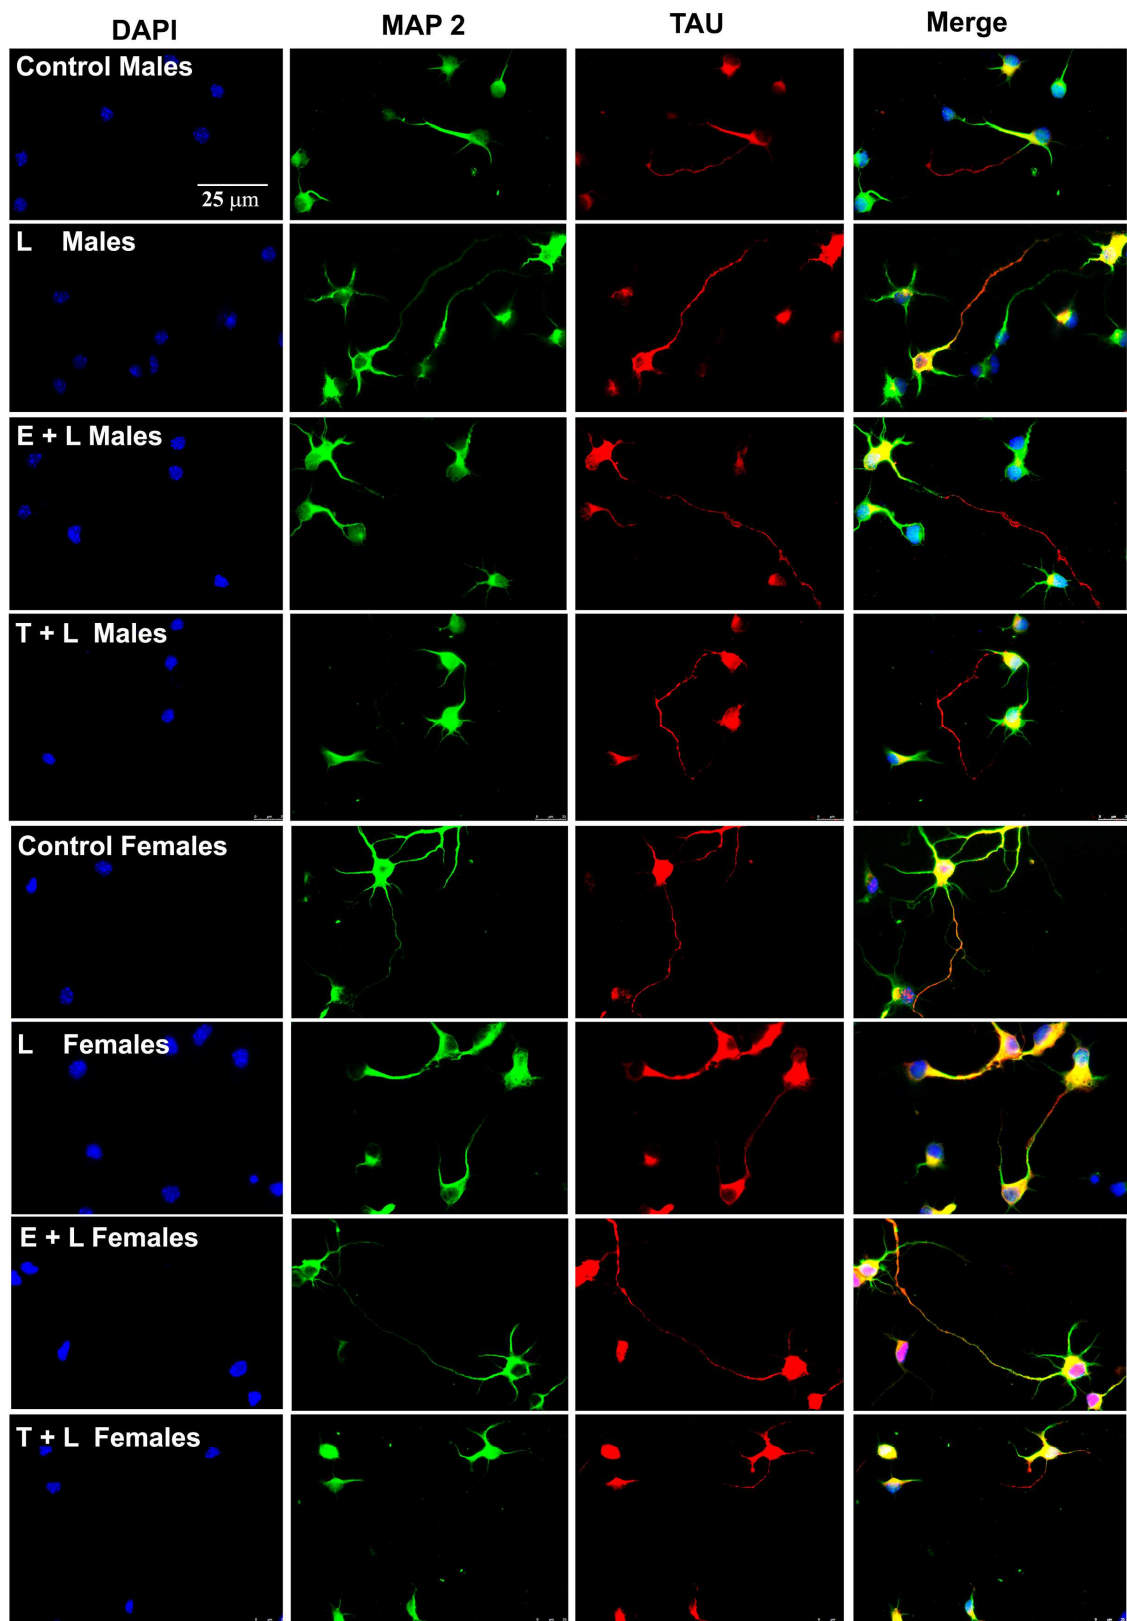

2

1 **Supplementary Fig. S2. Representative examples of male and female**  
2 **neurons treated with letrozole (L).** Hippocampal neuronal cultured were treated  
3 at 1 DIV with L, L+E2 and L+T and immunostained for MAP 2 (green), TAU (red)  
4 and DAPI (blue) at 2 DIV.

5  
6  
7  
8  
9  
10  
11  
12  
13  
14  
15  
16  
17  
18  
19  
20  
21  
22  
23  
24  
25  
26  
27  
28  
29

1 **Supplementary Fig. S3**

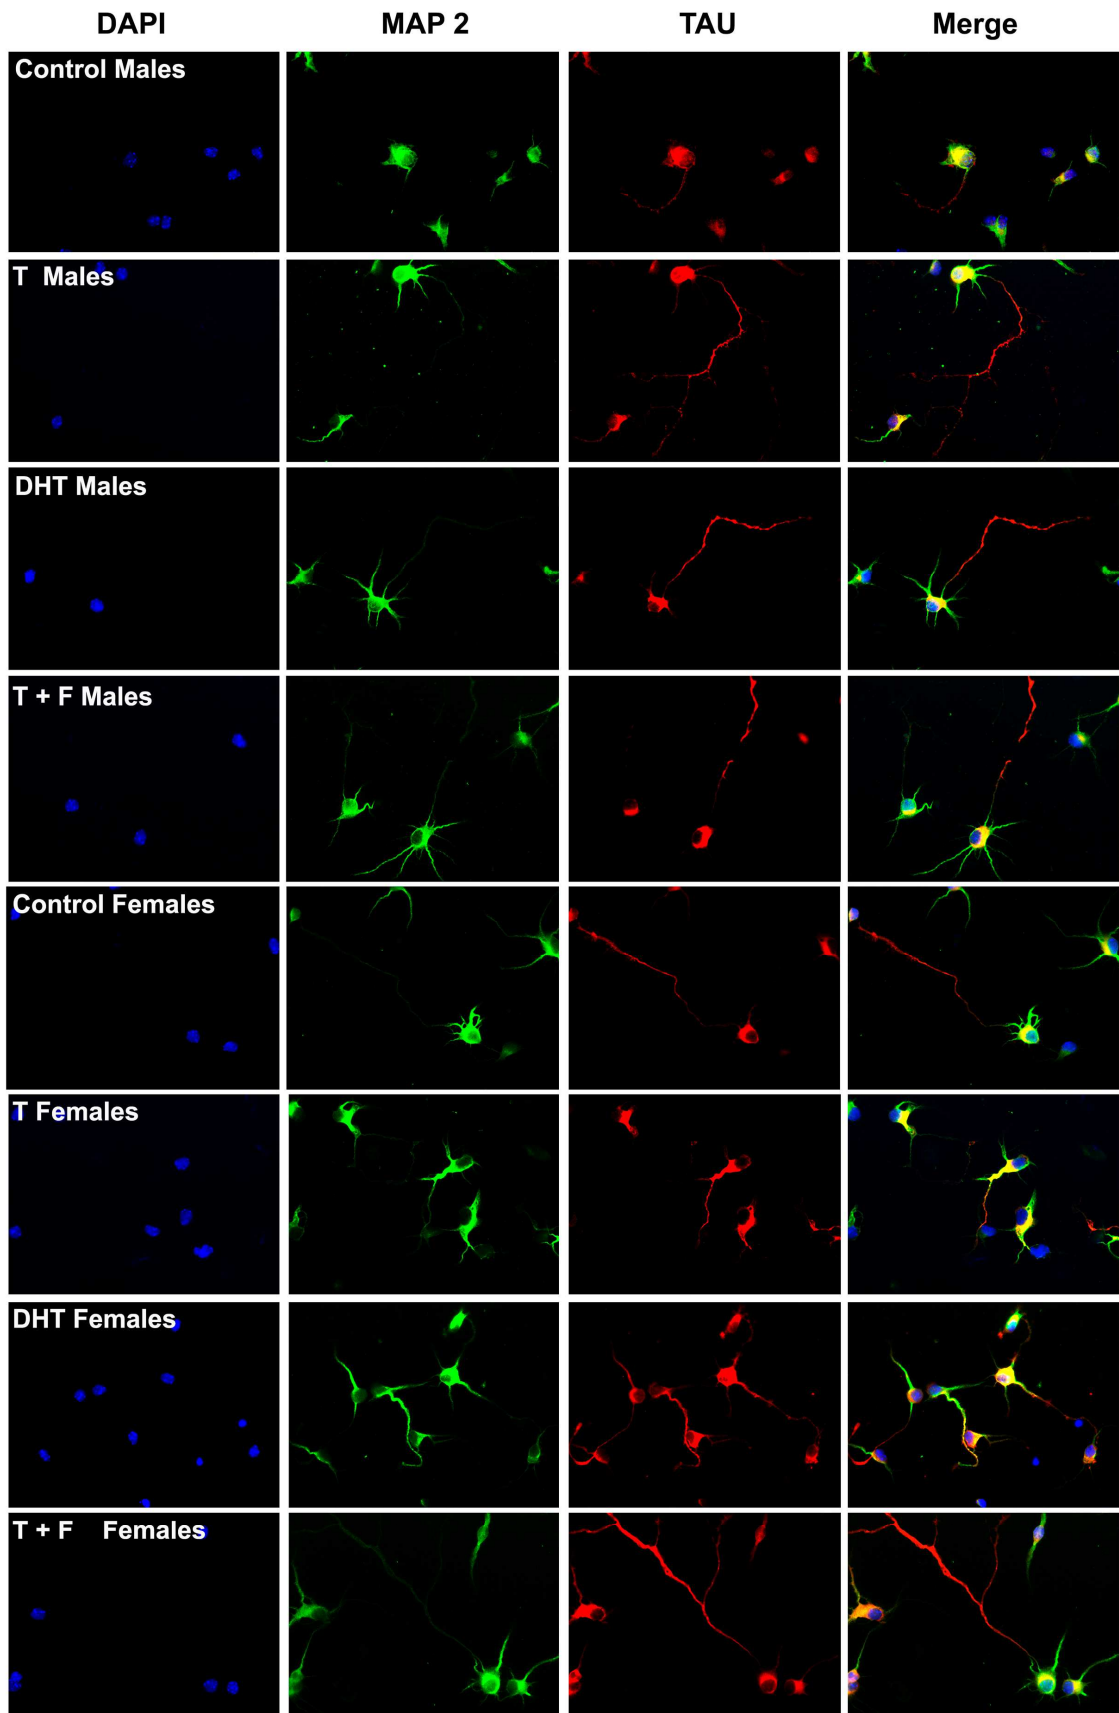

2

1 **Supplementary Fig. S3. Representative examples of male and female**  
2 **neurons treated with testosterone (T), dihydrotestosterone (DHT) and**  
3 **finasteride (F).** Hippocampal neuronal cultured were treated at 1 DIV with T, DHT  
4 and T+F and immunostained for MAP 2 (green), TAU (red) and DAPI (blue) at 2  
5 DIV.

6  
7  
8  
9  
10  
11  
12  
13  
14  
15  
16  
17  
18  
19  
20  
21  
22  
23  
24

1 **Supplementary Table 1. Levels of steroids in the culture medium of male and**  
 2 **female hippocampal neurons from E17 embryos**

| <b>Steroid</b>             | <b>Sex</b>     | <b>Levels in culture medium (pg/ml)</b> |
|----------------------------|----------------|-----------------------------------------|
| <b>Pregnenolone</b>        | <b>Males</b>   | <b>9.136 ± 1.764</b>                    |
|                            | <b>Females</b> | <b>12.02 ± 1.852</b>                    |
| <b>Progesterone</b>        | <b>Males</b>   | <b>2404 ± 216</b>                       |
|                            | <b>Females</b> | <b>2393 ± 200</b>                       |
| <b>Dihydroprogesterone</b> | <b>Males</b>   | <b>2026 ± 98</b>                        |
|                            | <b>Females</b> | <b>2034 ± 85</b>                        |
| <b>Isopregnanolone</b>     | <b>Males</b>   | <b>61.92 ± 12.79</b>                    |
|                            | <b>Females</b> | <b>63.81 ± 8.319</b>                    |
| <b>Allopregnanolone</b>    | <b>Males</b>   | <b>39.65 ± 8.371</b>                    |
|                            | <b>Females</b> | <b>32.09 ± 1.854</b>                    |
| <b>Testosterone</b>        | <b>Males</b>   | <b>2.349 ± 0.420</b>                    |
|                            | <b>Females</b> | <b>2.720 ± 0.403</b>                    |
| <b>Dihydrotestosterone</b> | <b>Males</b>   | <b>2.840 ± 1.226</b>                    |
|                            | <b>Females</b> | <b>1.280 ± 0.631</b>                    |
| <b>Oestradiol</b>          | <b>Males</b>   | <b>4.816 ± 0.594</b>                    |
|                            | <b>Females</b> | <b>4.253 ± 0.843</b>                    |

3  
 4 Data are mean±SEM from 8 cultures.  
 5

6
